# Supplementary material
Source: PubMed Central journal article supplement (PMC6948148)

Uncropped gel - Figure 1d

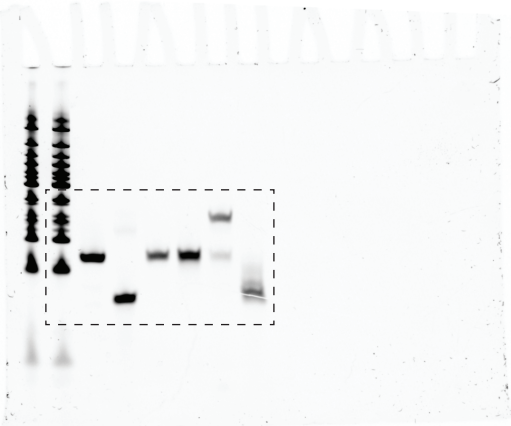

Uncropped gel - Figure 1e

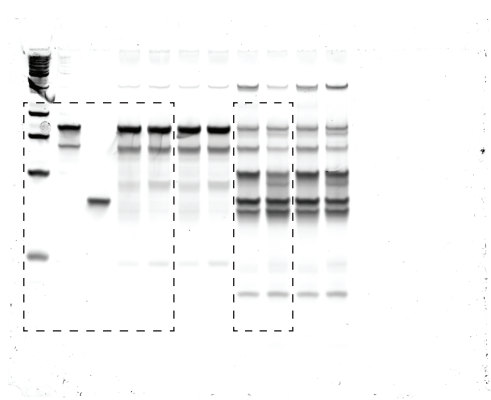

Uncropped autoradiograph -  
Figure 3d

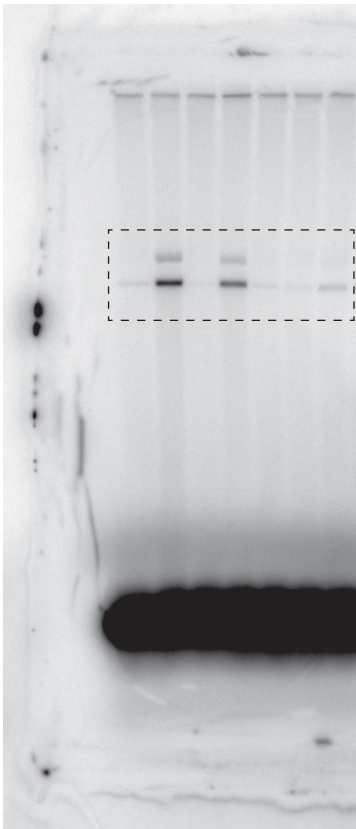

Uncropped gel - Figure 5e

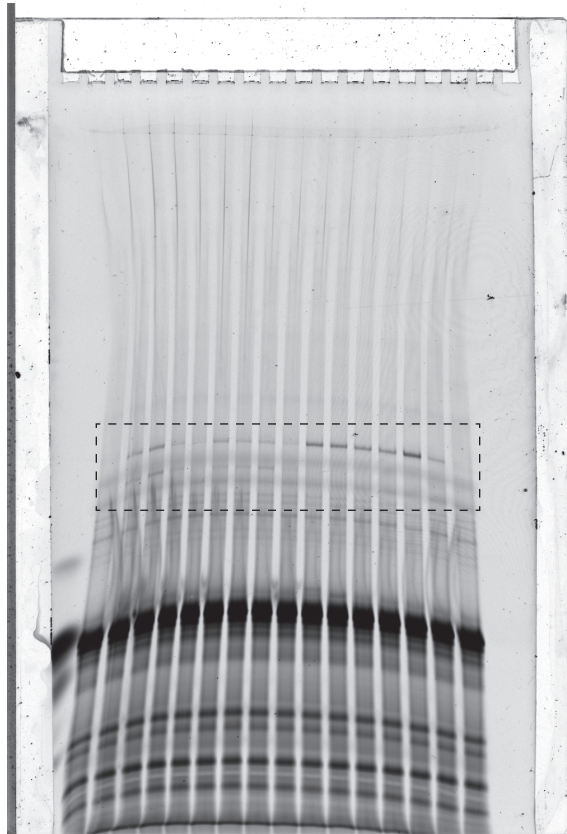

Supplement: NIHMS1064756-supplement-Supplemental_data_set.pdf [file NIHMS1064756-supplement-Supplemental_data_set.pdf]
